# Supplementary material for: Mixture-Based Combinatorial Libraries from Small Individual Peptide Libraries: A Case Study on α1-Antitrypsin Deficiency
Source: Molecules. 2014 May 16;19(5):6330–48. doi: 10.3390/molecules19056330 (PMC6271437; doi:10.3390/molecules19056330)

## Supplementary Material

**Figure S1.** 8% (w/v) 8 M urea native-PAGE demonstrating the result of the positional scanning library (Ac-TX<sub>2</sub>AF-NH<sub>2</sub>; X<sub>2</sub> = A, H, I, L, M, F, T, V, W and Y). The screening was performed with a 100-fold molar excess of each individual peptide (lane 1 to 10: Ac-TVAF-NH<sub>2</sub>, Ac-TIAF-NH<sub>2</sub>, Ac-TFAF-NH<sub>2</sub>, Ac-TYAF-NH<sub>2</sub>, Ac-TTAF-NH<sub>2</sub>, Ac-TWAF-NH<sub>2</sub>, Ac-THAF-NH<sub>2</sub>, Ac-TLAF-NH<sub>2</sub>, Ac-TAAF-NH<sub>2</sub> and Ac-TMAF-NH<sub>2</sub>) against M-AT at 37 °C for 2 h. The peptide Ac-TTAF-NH<sub>2</sub> annealed to M-AT under the same condition as Figure 1A in reference 55, indicating the peptide itself was sufficient to form binary complex. Note there were other 99 peptides in the sub-library of Ac-TTX<sub>3</sub>X<sub>4</sub>-NH<sub>2</sub> that may or may not bind to M-AT. In addition, the result also showed that a greater tolerance of amino acid at the X<sub>2</sub> position, as 7 out of the 10 selected amino acids were able to form intense binary complex.

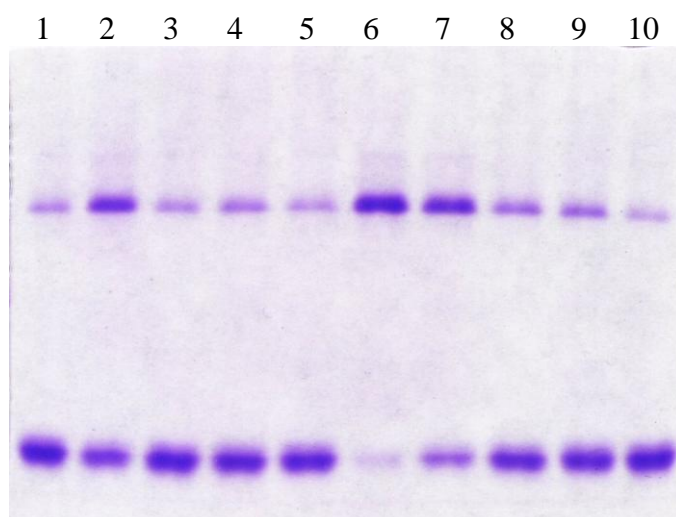

Supplement: Supplementary file 1 [file molecules-19-06330-s001.pdf]
